# Supplementary material for: Somatic mutation rates scale with time not growth rate in long-lived tropical trees
Source: eLife. 2024 Oct 23;12:RP88456. doi: 10.7554/eLife.88456 (PMC11498935; doi:10.7554/eLife.88456)
Supplement: Supplementary file 1. — (a) Mean annual increment (MAI) of diameter at breast height (DBH). (b) Matrix of physical distances (m) between sampling positions and the number of SNVs indicated in parentheses. (c) Summary statistics of the studied trees. Height and DBH were directly measured for two individuals of S. laevis and S. leprosula. Age was estimated as DBH divided by a mean annual increment (MAI). (d) Summary statistics of genome assemblies for S. laevis and S. leprosula. We assembled the genome using DNA extracted from the apical leaf at branch 1–1 of the tallest individual of each species (S1 and F1). Summary statistics of genome assemblies are listed here. (e) Summary statistics of whole genome sequencing. (f) The number of candidate SNVs during each step of the filtering process. (g) Assessment of candidate SNVs using amplicon sequencing. (h) Somatic mutation rates. The somatic mutation rate per nucleotide per meter was estimated as μg=b2×R, where b indicates the slope of linear regression. The somatic mutation per nucleotide per year (μy) was estimated as μy=M2×R×A, where M indicates the total number of SNVs accumulated from the base to the branch tip and A represents tree age, respectively. R denotes the number of callable sites. (i) Cosine similarity of mutation spectra between Shorea trees and humans. (j) Results of the binomial test for selection on somatic and inter-individual SNVs. To test whether somatic and inter-individual SNVs are subject to selection, we calculated the expected rate of non-synonymous mutation. Given the observed number of non-synonymous and synonymous mutations, we rejected the null hypothesis of neutral selection using a binomial test with the significance level of 5%. pN_expected and pN_observed represent the expected and observed rate of non-synonymous substitutions. (k) The final set of SNVs. (l) Fractions of synonymous, missense, and nonsense substitutions. (m) Somatic mutation rates for six substitution classes. Somatic mutation rates for six sub [file elife-88456-supp1.xlsx]

## Sheet: a
Species	Individual ID	DBH _1998	DBH_2000	DBH_2002	DBH_2004	DBH_2006	DBH_2008	DBH_2010	DBH_2012	DBH_2014	DBH_2016	DBH_2018	DBH_2020	MAI_1998-2000	MAI_2000-2002	MAI_2002-2004	MAI_2004-2006	MAI_2006-2008	MAI_2008-2010	MAI_2010-2012	MAI_2012-2014	MAI_2014-2016	MAI_2016-2018	MAI_2018-2000	Average MAI (cm)	Average (cm)
Shorea laevis	1		10.5732	12.1656	12.293	13.0573	13.7261	14.2038	14.4904	15.0637	15.6688	15.9873	16.5924		0.796178	0.0636943	0.382166	0.334395	0.238854	0.143312	0.286624	0.302548	0.159236	0.302548	0.300955	0.378185
Shorea laevis	2		15.4777	15.8599	16.3057	17.1019	18.0892	19.2357	20.4459	21.9108	22.1019	23.3439	24.586		0.191083	0.22293	0.398089	0.493631	0.573248	0.605096	0.732484	0.0955414	0.621019	0.621019	0.455414
Shorea leprosula	1	68.0573	70.2548	70.828	72.8662	75.0318	78.7261	79.8089						1.09873	0.286624	1.01911	1.0828	1.84713	0.541401						0.979299	1.2115
Shorea leprosula	2	71.242	72.4841	72.8662	73.7898	73.9809	73.9809	74.3631	74.8408	75.2229	75.2866			0.621019	0.191083	0.461783	0.0955414	0	0.191083	0.238854	0.191083	0.0318471			0.224699
Shorea leprosula	3	53.4076	55.8917	56.4331	57.5796	58.6624	60.7325	63.0573	65.2866	66.9745	67.3248	69.6178	70.2548	1.24204	0.270701	0.573248	0.541401	1.03503	1.16242	1.11465	0.843949	0.175159	1.1465	0.318471	0.765779
Shorea leprosula	4	30.7006	34.1083	35.6688	38.2166	41.2739	44.0127	46.879	50.0637	52.3567	60	62.8025	63.1847	1.70382	0.780255	1.27389	1.52866	1.36943	1.43312	1.59236	1.1465	3.82166	1.40127	0.191083	1.47655
Shorea leprosula	5	46.9745	50.5732	52.6115	55.6369	59.5541	62.0064	64.7771	68.4713	69.9363	70.1911	72.3567	72.5478	1.79936	1.01911	1.51274	1.9586	1.22611	1.38535	1.84713	0.732484	0.127389	1.0828	0.0955414	1.16242
Shorea leprosula	6	12.5796	15.9873	19.6815	23.1847	27.3885	31.3376	35.1274	39.6178	42.293	44.9045	47.7707	49.4904	1.70382	1.84713	1.75159	2.10191	1.97452	1.8949	2.24522	1.33758	1.30573	1.43312	0.859873	1.67776
Shorea leprosula	7				16.242	19.4904	23.6624	28.121	32.1338	35.0318	35.1911	41.5924	45.7962				1.6242	2.08599	2.2293	2.00637	1.44904	0.0796178	3.20064	2.10191	1.84713
Shorea leprosula	8	56.9745	60.6369	65.0318	68.3121	72.707	76.2739	81.4013						1.83121	2.19745	1.64013	2.19745	1.78344	2.56369						2.03556
Shorea leprosula	9	68.0573	70.2548	70.828	72.8662	75.0318	78.7261	79.8089						1.09873	0.286624	1.01911	1.0828	1.84713	0.541401						0.979299
Shorea leprosula	10	71.242	72.4841	72.8662	73.7898	73.9809	73.9809	74.3631	74.8408	75.2229	75.2866			0.621019	0.191083	0.461783	0.0955414	0	0.191083	0.238854	0.191083	0.0318471			0.224699
Shorea leprosula	11	53.4076	55.8917	56.4331	57.5796	58.6624	60.7325	63.0573	65.2866	66.9745	67.3248	69.6178	70.2548	1.24204	0.270701	0.573248	0.541401	1.03503	1.16242	1.11465	0.843949	0.175159	1.1465	0.318471	0.765779
Shorea leprosula	12	30.7006	34.1083	35.6688	38.2166	41.2739	44.0127	46.879	50.0637	52.3567	60	62.8025	63.1847	1.70382	0.780255	1.27389	1.52866	1.36943	1.43312	1.59236	1.1465	3.82166	1.40127	0.191083	1.47655
Shorea leprosula	13	46.9745	50.5732	52.6115	55.6369	59.5541	62.0064	64.7771	68.4713	69.9363	70.1911	72.3567	72.5478	1.79936	1.01911	1.51274	1.9586	1.22611	1.38535	1.84713	0.732484	0.127389	1.0828	0.0955414	1.16242
Shorea leprosula	14				16.242	19.4904	23.6624	28.121	32.1338	35.0318	35.1911	41.5924	45.7962				1.6242	2.08599	2.2293	2.00637	1.44904	0.0796178	3.20064	2.10191	1.84713
Shorea leprosula	15					12.5159	16.1783	20.2548	23.2803	25.1592	27.1975	28.7261	31.8471					1.83121	2.03822	1.51274	0.93949	1.01911	0.764331	1.56051	1.3808
Shorea leprosula	16	56.9745	60.6369	65.0318	68.3121	72.707	76.2739	81.4013						1.83121	2.19745	1.64013	2.19745	1.78344	2.56369						2.03556
Shorea leprosula	17	70.5096	74.3631	75.7962	78.3439	79.6178	81.5287	83.758						1.92675	0.716561	1.27389	0.636943	0.955414	1.11465						1.10403
Shorea leprosula	18	62.0701	64.7134	65.2866	66.7516	67.5159	68.5669	69.2675	71.8153	73.2484	74.8089	74.8408	76.6242	1.32166	0.286624	0.732484	0.382166	0.525478	0.350318	1.27389	0.716561	0.780255	0.0159236	0.89172	0.661552

## Sheet: b
Species	Individual ID	Branch ID	0	1_1	1_2	2_1	2_2	3_1	3_2	Distance from ground to 0
S. laevis	S1	1_1	39.94 (129)							1.59
S. laevis	S1	1_2	49.38 (256)	18.92 (252)
S. laevis	S1	2_1	47.60 (191)	47.14 (220)	56.58 (363)
S. laevis	S1	2_2	48.40 (183)	47.94 (212)	57.38 (355)	17 (122)
S. laevis	S1	3_1	43.15 (187)	42.69 (216)	52.13 (359)	34.35 (234)	35.15 (226)
S. laevis	S1	3_2	43.45 (187)	42.99 (216)	52.43 (359)	34.65 (234)	35.45 (226)	6.10 (66)
S. laevis	S1	4	49.95 (207)	49.49 (236)	58.93 (379)	41.15 (254)	41.95 (246)	16.70 (124)	17.00 (126)
S. laevis	S2	1_1	34.20 (81)							1.2
S. laevis	S2	1_2	34.35 (81)	18.35 (36)
S. laevis	S2	2_1	34.40 (107)	26.60 (76)	26.75 (76)
S. laevis	S2	2_2	34.70 (106)	26.90 (75)	27.05 (75)	6.90 (27)
S. laevis	S2	3_1	35.65 (93)	27.85 (62)	28.00 (62)	21.45 (74)	21.75 (73)
S. laevis	S2	3_2	35.95 (93)	28.15 (62)	28.30 (62)	21.75 (74)	22.05 (73)	5.10 (20)
S. laevis	S2	4	35.40 (98)	27.60 (67)	27.75 (67)	21.20 (79)	21.50 (78)	15.25 (57)	15.55 (57)
S. leprosula	F1	1_1	33.85 (41)							1.01
S. leprosula	F1	1_2	38.70 (43)	14.45 (17)
S. leprosula	F1	2_1	35.25 (53)	23.70 (32)	28.55 (34)
S. leprosula	F1	2_2	35.60 (56)	24.05 (35)	28.90 (37)	5.85 (13)
S. leprosula	F1	3_1	40.95 (52)	29.40 (31)	34.25 (33)	22.00 (31)	22.35 (34)
S. leprosula	F1	3_2	41.05 (49)	29.50 (28)	34.35 (30)	22.10 (28)	22.45 (31)	2.90 (7)
S. leprosula	F1	4	46.60 (50)	35.05 (29)	39.90 (31)	27.65 (29)	28.00 (32)	20.55 (20)	20.65 (17)
S. leprosula	F2	1_1	30.20 (25)							1.97
S. leprosula	F2	1_2	32.60 (18)	14.00 (29)
S. leprosula	F2	2_1	38.20 (13)	21.80 (24)	24.20 (13)
S. leprosula	F2	2_2	38.20 (15)	21.80 (26)	24.20 (15)	4.80 (6)
S. leprosula	F2	3_1	38.95 (17)	22.55 (28)	24.95 (17)	26.35 (12)	26.35 (14)
S. leprosula	F2	3_2	38.45 (18)	22.05 (29)	24.45 (18)	25.85 (13)	25.85 (15)	6.10 (7)
S. leprosula	F2	4	38.10 (23)	21.70 (34)	24.10 (23)	25.50 (18)	25.50 (20)	18.65 (18)	18.15 (19)

## Sheet: c
Species	Individual ID	Height (m)	DBH (cm)	Estimated age (year)
S. laevis	S1	51.5	122.8	324.9
S. laevis	S2	36.6	70.7	187
S. leprosula	F1	47.6	95.5	78.8
S. leprosula	F2	40.1	65.6	54.1

## Sheet: d
Category	Features	S. laevis	S. leprosula
Assembly	Sequencing Technology	PacBio CLR +	PacBio HiFi
		Illumina
	Number of Contigs	7695	70
	Total length of contigs (nt)	539910052	378538404
	Contig N50 (nt)	206905	39554423
	Number of Scaffolds	7745	70
	Total length of scaffolds (nt)	540441910	378538404
	Scaffold N50 excluding gaps (nt)	219154	39554423
	Maximum scaffold length excluding gaps (nt)	3442711	58083003
	Number of scaffolds > 1kbp	7427	70
	Number of N's per 100 kbp	1	0
	GC-content (%)	33.71	33.14
Annotation	Number of protein-coding genes	52935	40665
	% of repetitive sequences (identified by EDTA)	42.4	39.5
	% of Complete BUSCO genes	97.9	97.8
	% of Complete and single-copy BUSCO genes	65.8	76.7

## Sheet: e
Sequencer	Species	IndividualID-branchID-replicateID	Method		Total sequences (Gbp)	Coverage	Number of reads (million)	Average read length (bp)
Hiseq 2500	S. laevis	S1-0-1	Paired end, whole genome sequence		29.133	83.9568	233.064	125
Hiseq 2500	S. laevis	S1-1-1-1	Paired end, whole genome sequence		28.489	82.1009	227.91	125
Hiseq 2500	S. laevis	S1-1-4-1	Paired end, whole genome sequence		30.387	87.5706	243.1	125
Hiseq 2500	S. laevis	S1-2-3-1	Paired end, whole genome sequence		32.91	94.8415	263.28	125
Hiseq 2500	S. laevis	S1-2-4-1	Paired end, whole genome sequence		26.873	77.4438	214.98	125
Hiseq 2500	S. laevis	S1-3-3-1	Paired end, whole genome sequence		28.577	82.3545	228.63	125
Hiseq 2500	S. laevis	S1-3-4-1	Paired end, whole genome sequence		30.856	88.9222	246.84	125
Hiseq 2500	S. laevis	S1-4-4-1	Paired end, whole genome sequence		28.785	82.9539	230.27	125
HiseqX	S. laevis	S1-0-2	Paired end, whole genome sequence		16.19	46.6571	107.23	151
HiseqX	S. laevis	S1-1-1-2	Paired end, whole genome sequence		16.82	48.4726	111.39	151
HiseqX	S. laevis	S1-1-4-2	Paired end, whole genome sequence		15.58	44.8991	103.15	151
HiseqX	S. laevis	S1-2-3-2	Paired end, whole genome sequence		15.6	44.9568	103.29	151
HiseqX	S. laevis	S1-2-4-2	Paired end, whole genome sequence		14.55	41.9308	96.37	151
HiseqX	S. laevis	S1-3-3-2	Paired end, whole genome sequence		13.15	37.8963	87.06	151
HiseqX	S. laevis	S1-3-4-2	Paired end, whole genome sequence		15.43	44.4669	102.19	151
HiseqX	S. laevis	S1-4-4-2	Paired end, whole genome sequence		13.38	38.5591	88.64	151
HiseqX	S. laevis	S2-0-1	Paired end, whole genome sequence		39.77	114.611	263.3	151
HiseqX	S. laevis	S2-1-1-1	Paired end, whole genome sequence		43.6	125.648	288.7	151
HiseqX	S. laevis	S2-1-4-1	Paired end, whole genome sequence		30.14	86.8588	199.6	151
HiseqX	S. laevis	S2-2-3-1	Paired end, whole genome sequence		31.76	91.5274	210.3	151
HiseqX	S. laevis	S2-2-4-1	Paired end, whole genome sequence		31.68	91.2968	209.8	151
HiseqX	S. laevis	S2-3-3-1	Paired end, whole genome sequence		38.32	110.432	253.8	151
HiseqX	S. laevis	S2-3-4-1	Paired end, whole genome sequence		29.53	85.1009	195.57	151
HiseqX	S. laevis	S2-4-4-1	Paired end, whole genome sequence		30.82	88.8184	204.1	151
HiseqX	S. laevis	S2-0-2	Paired end, whole genome sequence		17.96	51.7579	119	151
HiseqX	S. laevis	S2-1-1-2	Paired end, whole genome sequence		20.01	57.6657	132.5	151
HiseqX	S. laevis	S2-1-4-2	Paired end, whole genome sequence		14.81	42.6801	98.07	151
HiseqX	S. laevis	S2-2-3-2	Paired end, whole genome sequence		17.34	49.9712	114.8	151
HiseqX	S. laevis	S2-2-4-2	Paired end, whole genome sequence		14.62	42.1326	96.8	151
HiseqX	S. laevis	S2-3-3-2	Paired end, whole genome sequence		19.5	56.196	129.1	151
HiseqX	S. laevis	S2-3-4-2	Paired end, whole genome sequence		16.23	46.7723	107.46	151
HiseqX	S. laevis	S2-4-4-2	Paired end, whole genome sequence		16.2	46.6859	107.3	151
PacBio CLR	S. laevis	S1_PacBio	Sequel, whole genome		55.38	159.597	3.85	9184
Hiseq 2500	S. leprosula	F1-0-1	Paired end, whole genome sequence		31.89	84.8138	212.62	150
Hiseq 2500	S. leprosula	F1-1-1-1	Paired end, whole genome sequence		37.93	100.878	252.89	150
Hiseq 2500	S. leprosula	F1-1-4-1	Paired end, whole genome sequence		37.65	100.133	251.01	150
Hiseq 2500	S. leprosula	F1-2-3-1	Paired end, whole genome sequence		34.27	91.1436	228.44	150
Hiseq 2500	S. leprosula	F1-2-4-1	Paired end, whole genome sequence		33.94	90.266	226.25	150
Hiseq 2500	S. leprosula	F1-3-3-1	Paired end, whole genome sequence		34.19	90.9309	227.9	150
Hiseq 2500	S. leprosula	F1-3-4-1	Paired end, whole genome sequence		37.27	99.1223	248.46	150
Hiseq 2500	S. leprosula	F1-4-4-1	Paired end, whole genome sequence		38.25	101.729	254.98	150
HiseqX	S. leprosula	F1-0-2	Paired end, whole genome sequence		15.79	41.9947	104.58	151
HiseqX	S. leprosula	F1-1-1-2	Paired end, whole genome sequence		14.34	38.1383	94.94	151
HiseqX	S. leprosula	F1-1-4-2	Paired end, whole genome sequence		14.59	38.8032	96.65	151
HiseqX	S. leprosula	F1-2-3-2	Paired end, whole genome sequence		16.49	43.8564	109.23	151
HiseqX	S. leprosula	F1-2-4-2	Paired end, whole genome sequence		14.69	39.0691	97.29	151
HiseqX	S. leprosula	F1-3-3-2	Paired end, whole genome sequence		16.08	42.766	106.49	151
HiseqX	S. leprosula	F1-3-4-2	Paired end, whole genome sequence		17.31	46.0372	114.61	151
HiseqX	S. leprosula	F1-4-4-2	Paired end, whole genome sequence		17.59	46.7819	116.51	151
HiseqX	S. leprosula	F2-0-1	Paired end, whole genome sequence		19.09	50.7713	126.43	151
HiseqX	S. leprosula	F2-1-1-1	Paired end, whole genome sequence		19.25	51.1968	127.51	151
HiseqX	S. leprosula	F2-1-4-1	Paired end, whole genome sequence		14.2	37.766	94.04	151
HiseqX	S. leprosula	F2-2-3-1	Paired end, whole genome sequence		18.09	48.1117	119.82	151
HiseqX	S. leprosula	F2-2-4-1	Paired end, whole genome sequence		14.14	37.6064	93.65	151
HiseqX	S. leprosula	F2-3-3-1	Paired end, whole genome sequence		16.71	44.4415	110.66	151
HiseqX	S. leprosula	F2-3-4-1	Paired end, whole genome sequence		16.43	43.6968	108.81	151
HiseqX	S. leprosula	F2-4-4-1	Paired end, whole genome sequence		14.65	38.9628	97	151
HiseqX	S. leprosula	F2-0-1	Paired end, whole genome sequence		22.34	59.4149	147.96	151
HiseqX	S. leprosula	F2-1-1-1	Paired end, whole genome sequence		18.71	49.7606	123.88	151
HiseqX	S. leprosula	F2-1-4-1	Paired end, whole genome sequence		15.73	41.8351	104.15	151
HiseqX	S. leprosula	F2-2-3-1	Paired end, whole genome sequence		16.06	42.7128	106.36	151
HiseqX	S. leprosula	F2-2-4-1	Paired end, whole genome sequence		15.15	40.2926	100.34	151
HiseqX	S. leprosula	F2-3-3-1	Paired end, whole genome sequence		16.66	44.3085	110.32	151
HiseqX	S. leprosula	F2-3-4-1	Paired end, whole genome sequence		14.46	38.4574	95.75	151
HiseqX	S. leprosula	F2-4-4-1	Paired end, whole genome sequence		15.55	41.3564	102.95	151
PacBio HiFi	S. leprosula	F1_PacBio	Sequel II, Hifi read, whole genome sequence		12.2	32.4468	0.96	12589

## Sheet: f
Species	Individual ID	Replicate ID	SNV caller and threshold	Numbe of called SNVs	Merged SNVs	Candidate SNVs	Final set of SNVs
S. laevis	S1	1	GATK	776745	5702	1003	728
S. laevis	S1	2	GATK	751067
S. laevis	S1	1	bcftools T40	2322977	1507
S. laevis	S1	2	bcftools T40	523200
S. laevis	S1	1	bcftools T30	481239	3309
S. laevis	S1	2	bcftools T30	522752
S. laevis	S1	1	bcftools T20	499477	3346
S. laevis	S1	2	bcftools T20	550570
S. laevis	S2	1	GATK	2758379	19163	923	234
S. laevis	S2	2	GATK	2363371
S. laevis	S2	1	bcftools T40	1499906	14309
S. laevis	S2	2	bcftools T40	1679963
S. laevis	S2	1	bcftools T30	1636046	15101
S. laevis	S2	2	bcftools T30	1839489
S. laevis	S2	1	bcftools T20	1781470	16382
S. laevis	S2	2	bcftools T20	2010692
S. leprosula	F1	1	GATK	2088324	10659	301	106
S. leprosula	F1	2	GATK	1688325
S. leprosula	F1	1	bcftools T40	2535658	5278
S. leprosula	F1	2	bcftools T40	1313470
S. leprosula	F1	1	bcftools T30	1457579	6190
S. leprosula	F1	2	bcftools T30	1315859
S. leprosula	F1	1	bcftools T20	1457579	6206
S. leprosula	F1	2	bcftools T20	1360589
S. leprosula	F2	1	GATK	4978324	69405	1694	68
S. leprosula	F2	2	GATK	5081665
S. leprosula	F2	1	bcftools T40	2876942	32853
S. leprosula	F2	2	bcftools T40	2907731
S. leprosula	F2	1	bcftools T30	3268986	38319
S. leprosula	F2	2	bcftools T30	3324388
S. leprosula	F2	1	bcftools T20	3606717	42629
S. leprosula	F2	2	bcftools T20	3676575

## Sheet: g
Individual ID	Contig or scaffold ID	Position	Features	Forward primer	Reverse primer	Summary
S1	contig_1060	350388	FALSE	CGCTCTTCCGATCTCTGAAAAAGAAATAAATTATACCGA	TGCTCTTCCGATCTGACCAAAAAGTTGAAGGGCATTCTG	% TRUE
S1	contig_10950	6979	TRUE	CGCTCTTCCGATCTCTGCTCACCTTAAAATTGGCTAAAC	TGCTCTTCCGATCTGACGATAATAAAATTGATCCAAATA	S1: 91.7
S1	contig_1140	13683	TRUE	CGCTCTTCCGATCTCTGATACACCCAAGAATAATTGCAC	TGCTCTTCCGATCTGACGAAAAAGCAGGATATATAGCTC	S2 : 100
S1	contig_12432	12504	TRUE	CGCTCTTCCGATCTCTGATGGCTCTTTCAGTCATGATTA	TGCTCTTCCGATCTGACTTCTTTCTCATATACCTCGCTA
S1	contig_12619	101584	TRUE	CGCTCTTCCGATCTCTGTTTAAGGATTAATTGGATAATG	TGCTCTTCCGATCTGACAAGAAAACTATAACTGAACCAC
S1	contig_1779	22288	TRUE	CGCTCTTCCGATCTCTGAGCTCCAAATATAGATATCTAA	TGCTCTTCCGATCTGACATCAAAGGTGAGTGGCTTGTCC
S1	contig_1862	271553	TRUE	CGCTCTTCCGATCTCTGCAACTTCTCCAAGGGTAGATAG	TGCTCTTCCGATCTGACATTACAAAAATCGTCATACGGT
S1	contig_20	271023	TRUE	CGCTCTTCCGATCTCTGCTAAGAGGCCTCACGCACCTTC	TGCTCTTCCGATCTGACCCCTCTAATGCATTACCACTTG
S1	contig_2202	213509	TRUE	CGCTCTTCCGATCTCTGAATTTTTCGATATCTGATAACC	TGCTCTTCCGATCTGACGCAGTCTGTTTCTCAAACCCAT
S1	contig_2208	112908	TRUE	CGCTCTTCCGATCTCTGTGACAAAGTAACAATGGGTTGC	TGCTCTTCCGATCTGACAAAGAGGATCCTTCGCTATGTG
S1	contig_2732	448492	TRUE	CGCTCTTCCGATCTCTGTTAATTACGGGTGAGCATTGGC	TGCTCTTCCGATCTGACACAAAAACTTAATACCCATTCC
S1	contig_2782	56317	FALSE	CGCTCTTCCGATCTCTGGAAATTCAATGAAGCGGACTGG	TGCTCTTCCGATCTGACTTGTAGAAGGGCAGGATCAAGG
S1	contig_2922	30089	TRUE	CGCTCTTCCGATCTCTGCTGCAGTTTTGAGATACTATTC	TGCTCTTCCGATCTGACAACTAATTAAGGATATGTTTGG
S1	contig_3085	147308	TRUE	CGCTCTTCCGATCTCTGACCAGCCAGAGAGTGCAAGTAG	TGCTCTTCCGATCTGACGGACCACCCTTTCTGTATTCCA
S1	contig_3501	46900	TRUE	CGCTCTTCCGATCTCTGAAAGGAAGGGTGATGGCTTGTA	TGCTCTTCCGATCTGACCTTAACTTGACTCATTGGGTTG
S1	contig_5224	157088	TRUE	CGCTCTTCCGATCTCTGTCTGGCCCCAGCGCTTTATACC	TGCTCTTCCGATCTGACAGGCTCAAAACAGTATTACAGG
S1	contig_5254	33237	TRUE	CGCTCTTCCGATCTCTGCATGCCCTGTGATTCGAGTTTG	TGCTCTTCCGATCTGACCTGTGGCCTTCAGAATAGCGTA
S1	contig_5586	8784	TRUE	CGCTCTTCCGATCTCTGATTTTATAGCTCCTCACAATTA	TGCTCTTCCGATCTGACAAATTTGCTATTGAATATGACT
S1	contig_6888	171513	TRUE	CGCTCTTCCGATCTCTGAAGGGCAAGGAGTCATCATCGT	TGCTCTTCCGATCTGACTAGGGCATCTGCTCACATTAGG
S1	contig_7039	10497	TRUE	CGCTCTTCCGATCTCTGTTATTTAAGGGCAACCGAACTG	TGCTCTTCCGATCTGACTTGAGATACATGGCAAACGGAC
S1	contig_7521	7457	TRUE	CGCTCTTCCGATCTCTGACATATGGGTTTTATAGTCTTA	TGCTCTTCCGATCTGACCCATTATTGTTTATTTTGATAC
S1	contig_923	1174383	TRUE	CGCTCTTCCGATCTCTGAGATGCCTTATTGTTACTATTG	TGCTCTTCCGATCTGACGGGGACTGACTATATTATATGC
S1	contig_9853	1153	TRUE	CGCTCTTCCGATCTCTGACTTATTAGCAAGGCTATCTCC	TGCTCTTCCGATCTGACGAGAACATTAACCTCGGGTCTG
S1	scaffold_259	1640887	TRUE	CGCTCTTCCGATCTCTGGTCATGAGCGCAGTCCTAGTCC	TGCTCTTCCGATCTGACTCTCCTCTTATATAACCGATTC
S2	contig_1017	235187	TRUE	CGCTCTTCCGATCTCTGTGCAATAGTACTTTAGAGTGCC	TGCTCTTCCGATCTGACGGAGTAGGTGTCTTGCACTTTA
S2	contig_12500	57282	TRUE	CGCTCTTCCGATCTCTGTTTTCAACAGTGAGGGGAATAG	TGCTCTTCCGATCTGACAACAATATGTTCCTGGAATACC
S2	contig_1437	323519	TRUE	CGCTCTTCCGATCTCTGTGGCTATATAAGGTAGTGGGTA	TGCTCTTCCGATCTGACGTAGCCAAAGCCCTTGAATCTC
S2	contig_2283	167052	TRUE	CGCTCTTCCGATCTCTGCGGCTTCCCTCTCTGTACCTTC	TGCTCTTCCGATCTGACAAATGCAGAGCTGCTAGTTCAC
S2	contig_2327	986562	TRUE	CGCTCTTCCGATCTCTGATCTCGCGATCGGAGCTCTATG	TGCTCTTCCGATCTGACTTTATCAGTAATCAAGCGAACC
S2	contig_5377	211342	TRUE	CGCTCTTCCGATCTCTGTAAATAACCCTCTCATACTTTC	TGCTCTTCCGATCTGACAAGATGTTTGGGTAGCTTCACG
S2	contig_5385	330921	TRUE	CGCTCTTCCGATCTCTGTGATTTGTATACTTTTCGATTC	TGCTCTTCCGATCTGACGCTTCTTGGTATTGTTAATGGC
S2	contig_926	1182998	TRUE	CGCTCTTCCGATCTCTGTCTGTCCCCTCCCCAAATTGTA	TGCTCTTCCGATCTGACCTGAATATGGTCGCCGCATTAG
S2	scaffold_3343	296271	TRUE	CGCTCTTCCGATCTCTGAAATATTTGAAGTAGGGCATTA	TGCTCTTCCGATCTGACCTTGACCCCCTTTGATTAGGTA

## Sheet: h
Species	S. laevis		S. leprosula
individual ID	S1	S2	F1	F2
Coefficient of linear regression	5.503	2.74	1.149	0.679
(95% confidence interval)	(4.985–6.020)	(2.561–2.919)	(1.06–1.239)	(0.552–0.806)
	7.08×10-9	4.27×10-9	1.77×10-9	1.29×10-9
(95% confidence interval)	(6.41–7.74×10−9)	(3.99–4.55×10−9)	(1.64–1.91×10−9)	(1.05–1.53×10−9)
	7.58×10-10	7.85×10-10	9.63×10-10	6.46×10-10
(95% confidence interval)	(4.67–10.1×10-10)	(6.12–9.57×10-10)	(7.56–11.7×10-10)	(3.55–9.38×10-10)
Average of	5.67×10-9		1.53×10-9
within species
Average of	7.71×10-10		8.05×10-10
within species

## Sheet: i
Single-base-substitution (SBS) signature in humans	S. laevis (S1+S2)	S. leprosula (F1+F2)
SBS1	0.788714	0.592319	* Bolds indicate the top 5 highest values.
SBS2	0.223088	0.155441
SBS3	0.371485	0.389196
SBS4	0.202823	0.213284
SBS5	0.57731	0.557853
SBS6	0.823197	0.770605
SBS7a	0.337553	0.295345
SBS7b	0.426948	0.407783
SBS7c	0.105043	0.0926553
SBS7d	0.141236	0.144054
SBS8	0.193485	0.206024
SBS9	0.236403	0.267998
SBS10a	0.064482	0.0626035
SBS10b	0.463811	0.275708
SBS10c	0.220404	0.200902
SBS10d	0.0729807	0.0741616
SBS11	0.432572	0.399199
SBS12	0.160551	0.179725
SBS13	0.037433	0.0334724
SBS14	0.174692	0.0987906
SBS15	0.580608	0.689691
SBS16	0.135109	0.135786
SBS17a	0.0755361	0.0934057
SBS17b	0.0186204	0.0532802
SBS18	0.257379	0.246579
SBS19	0.416096	0.376919
SBS20	0.273849	0.222302
SBS21	0.133776	0.156302
SBS22	0.0614862	0.0773765
SBS23	0.452771	0.397381
SBS24	0.271629	0.317383
SBS25	0.422223	0.388796
SBS26	0.196966	0.192849
SBS27	0.119627	0.108179
SBS28	0.0339604	0.0444065
SBS29	0.262899	0.25896
SBS30	0.513249	0.474989
SBS31	0.380187	0.357156
SBS32	0.561224	0.485054
SBS33	0.106281	0.112971
SBS34	0.0925331	0.0713725
SBS35	0.234741	0.24169
SBS36	0.147035	0.127773
SBS37	0.207945	0.218592
SBS38	0.0838056	0.110371
SBS39	0.271549	0.288764
SBS40	0.406834	0.401922
SBS41	0.227504	0.228982
SBS42	0.407134	0.346656
SBS43	0.049742	0.0862671
SBS44	0.467888	0.436752
SBS45	0.0981116	0.0926934
SBS46	0.266844	0.289613
SBS47	0.16047	0.155084
SBS48	0.03587	0.00460694
SBS49	0.0664203	0.0401063
SBS50	0.230475	0.233193
SBS51	0.211093	0.20554
SBS52	0.0570528	0.0521624
SBS53	0.139728	0.163201
SBS54	0.187188	0.175139
SBS55	0.0684923	0.0963316
SBS56	0.0714443	0.0652922
SBS57	0.23122	0.222238
SBS58	0.307788	0.288491
SBS59	0.059221	0.0498293
SBS60	0.0181821	0.0229087
SBS84	0.376837	0.323435
SBS85	0.134784	0.146242
SBS86	0.213945	0.158577
SBS87	0.750548	0.606818
SBS88	0.113478	0.131951
SBS89	0.350737	0.353598
SBS90	0.0697584	0.0322702
SBS91	0.0754309	0.0558549
SBS92	0.446888	0.410966
SBS93	0.287775	0.254174
SBS94	0.438231	0.437588

## Sheet: j
Type of SNVs	Genomic region used for background mutation inference	Summary statistics	S. laevis	S. leprosula
Somatic SNVs	Intergenic	pN_expected	0.712	0.717
		pN_observed	0.734	0.733
		P value	0.711	1
	Whole genome	pN_expected	0.716	0.723
		pN_observed	0.734	0.733
		P value	0.803	1
Inter-individual SNVs	Intergenic	pN_expected	0.712	0.717
		pN_observed	0.546	0.592
		P value	<2.20×10-16	<2.20×10-16
	Whole genome	pN_expected	0.716	0.723
		pN_observed	0.546	0.592
		P value	<2.20×10-16	<2.20×10-16

[truncated: 4 more sheets: k, l, m, n]
